# Supplementary material
Source: MDPI journal article supplement (https://www.mdpi.com/2410-3888/8/11/540)
Supplement: s1 [file s1]

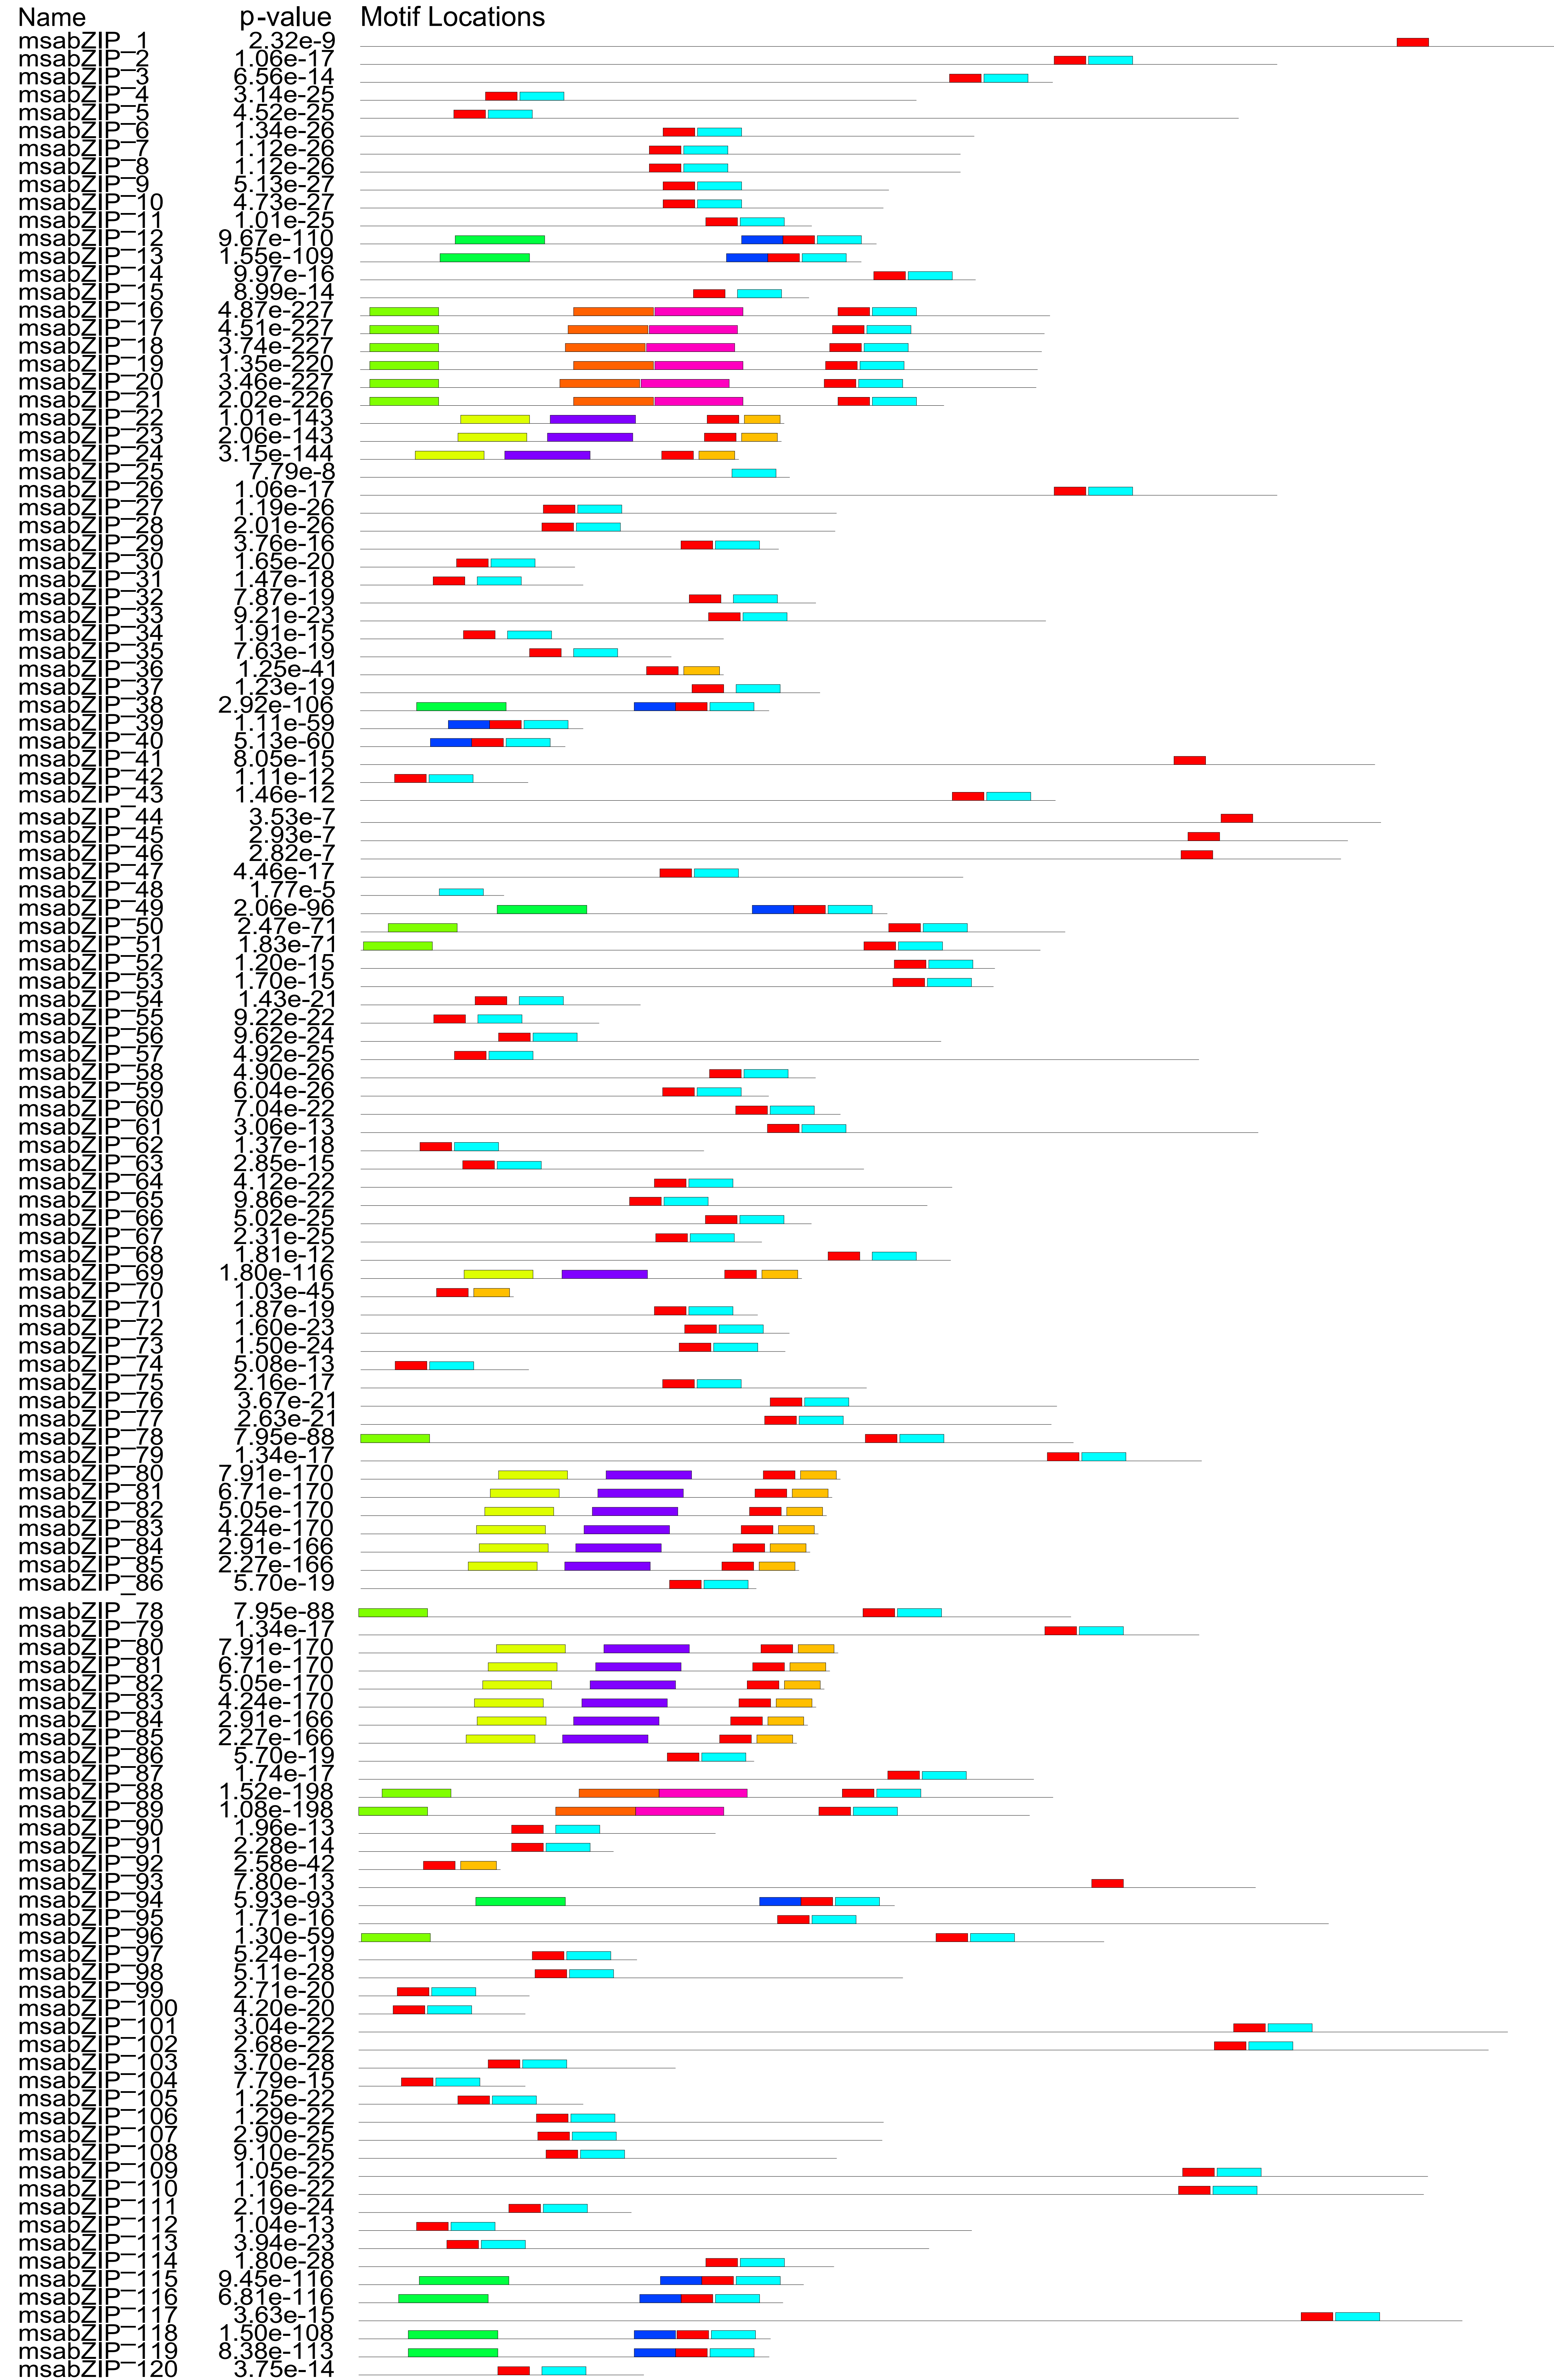

| Motif | Symbol      | Motif Consensus                                                   |
|-------|-------------|-------------------------------------------------------------------|
| 1.    | <div></div> | RRRRREKNREAAQRCRKKKKEYV                                           |
| 2.    | <div></div> | LEKEVDKLEEEENARLRAEVEELRKEVEQLKQL                                 |
| 3.    | <div></div> | MGDDRRPFVCNAPGCGQRFITNEDHLSVHKHKHEMTLKFGPARTDSVIIADQ              |
| 4.    | <div></div> | PIYQTSSGQYIAITGGGAIQLANNGTGQVGLQTLTMANAAAAQPGATILQYAQTS DGQQIL    |
| 5.    | <div></div> | NRVAVLENQNKTLEELKALKDLYCH                                         |
| 6.    | <div></div> | AGSGSGGGGEDNGGGGGGGGPQSAFLGPAJWDKTPYDGETFQLEYMDLEEFSENGIPSSPEZESL |
| 7.    | <div></div> | HKFSEELKPPQPMIKKARKVFVPEELKDDK                                    |
| 8.    | <div></div> | LPNGQTVPLLPSPVQMTSVISLARPVNSVPNIPGIPGPPIGGASSGSSSPSGYSLHSETKMRLK  |
| 9.    | <div></div> | PVASSAPTPTIVRPGSLPLHMSNDPLHPTLPSPTS VITQAPPSNRQLGSPTGSYPLVR       |
| 10.   | <div></div> | ISTIAESEDSQESVTD SQKRREILSRRPSYRKILNDLSSDAPAVPRI                  |
