# Supplementary material
Source: MDPI journal article supplement (https://www.mdpi.com/2410-3888/8/11/540)

a

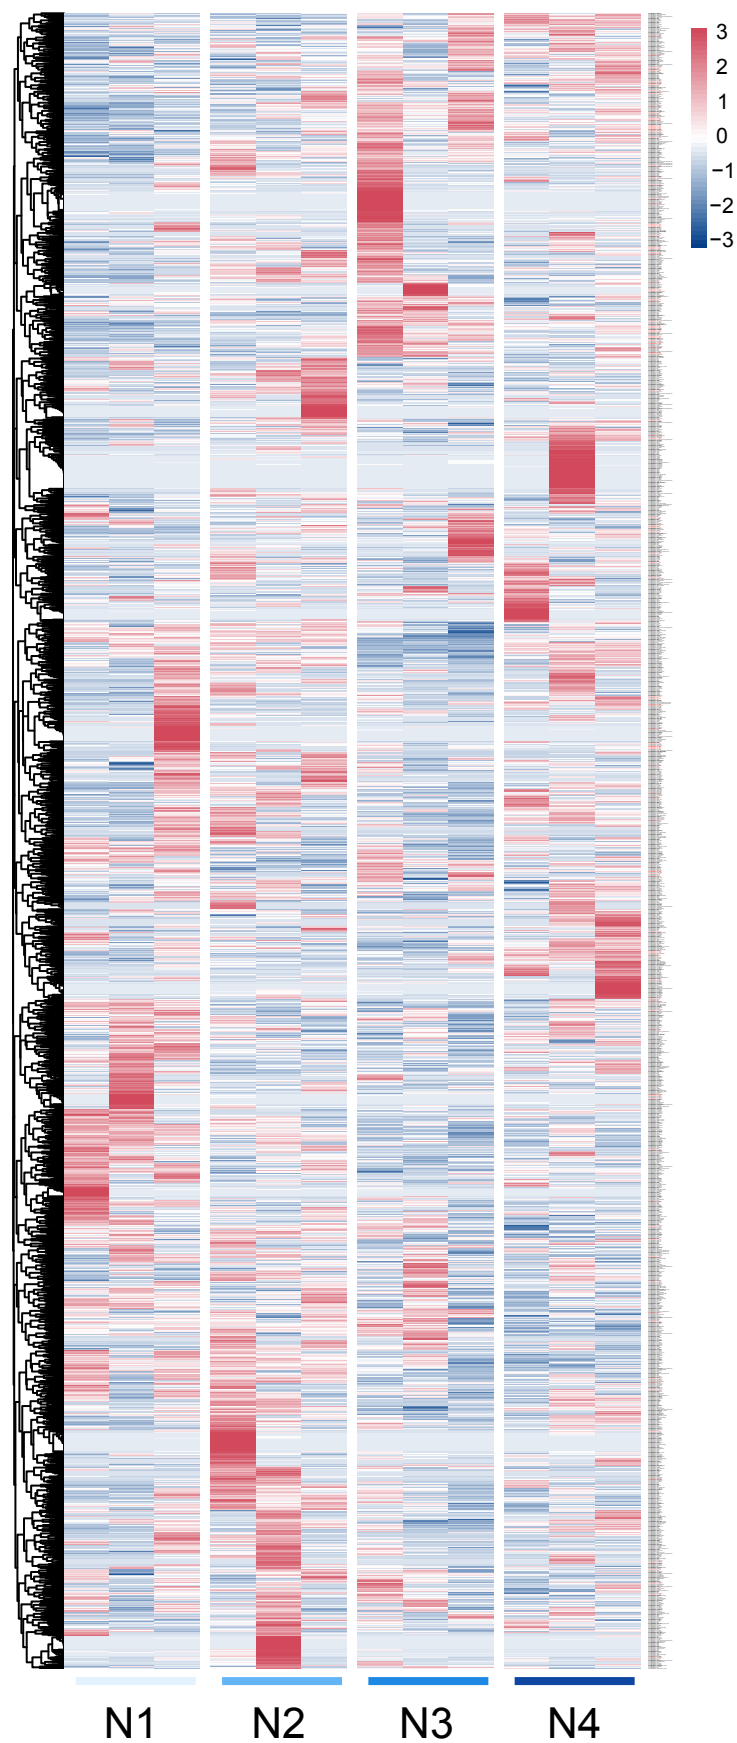

b

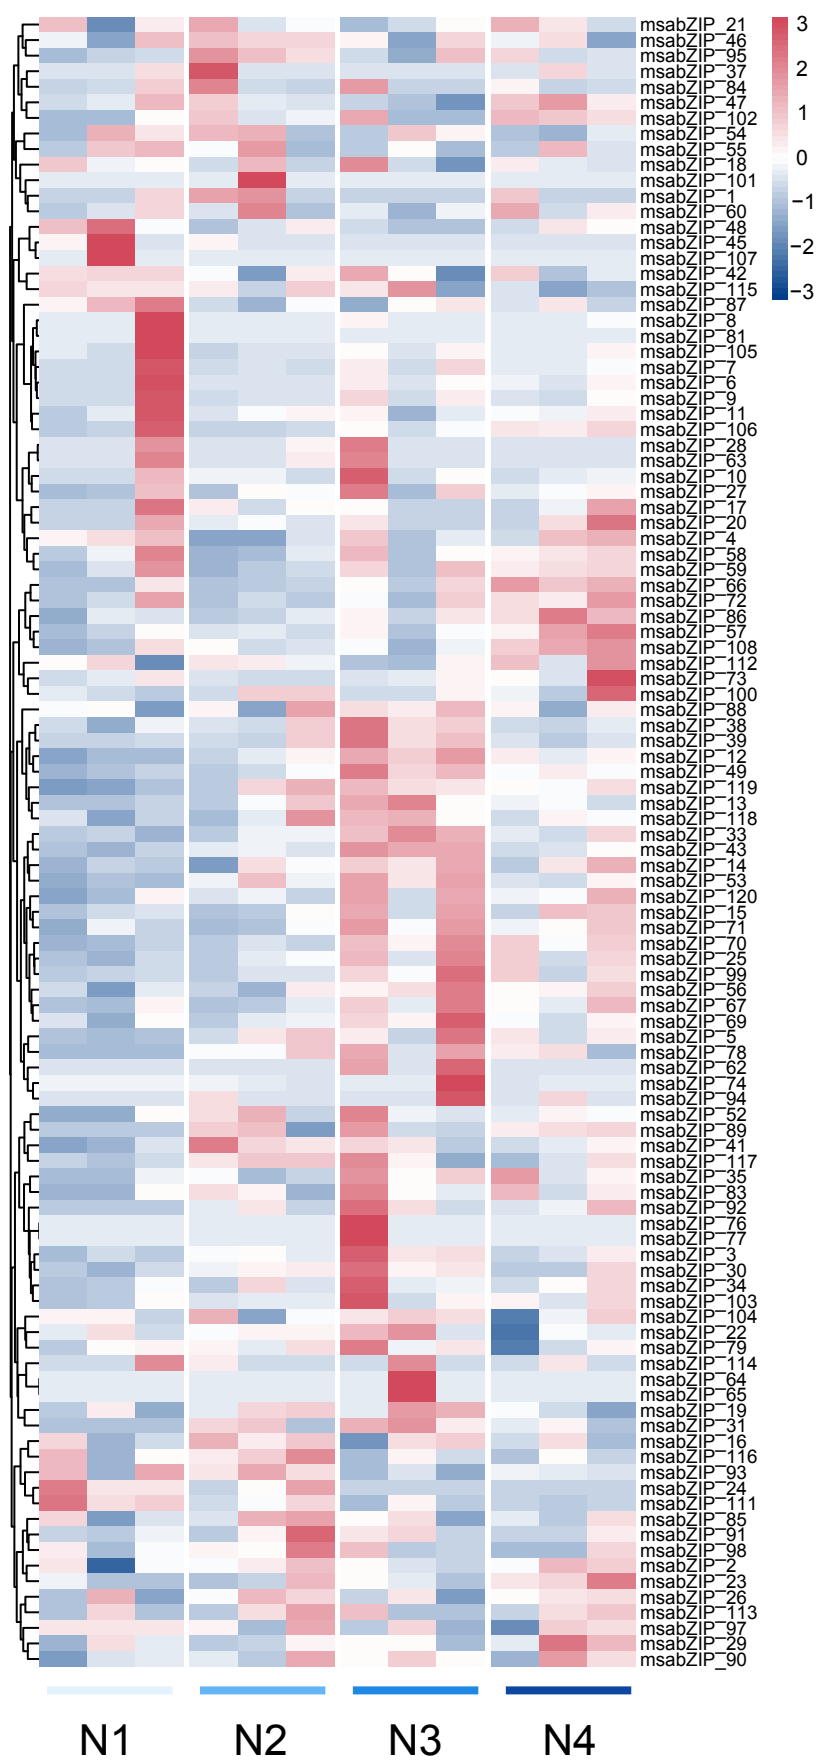

Supplement: s1 [file s1]

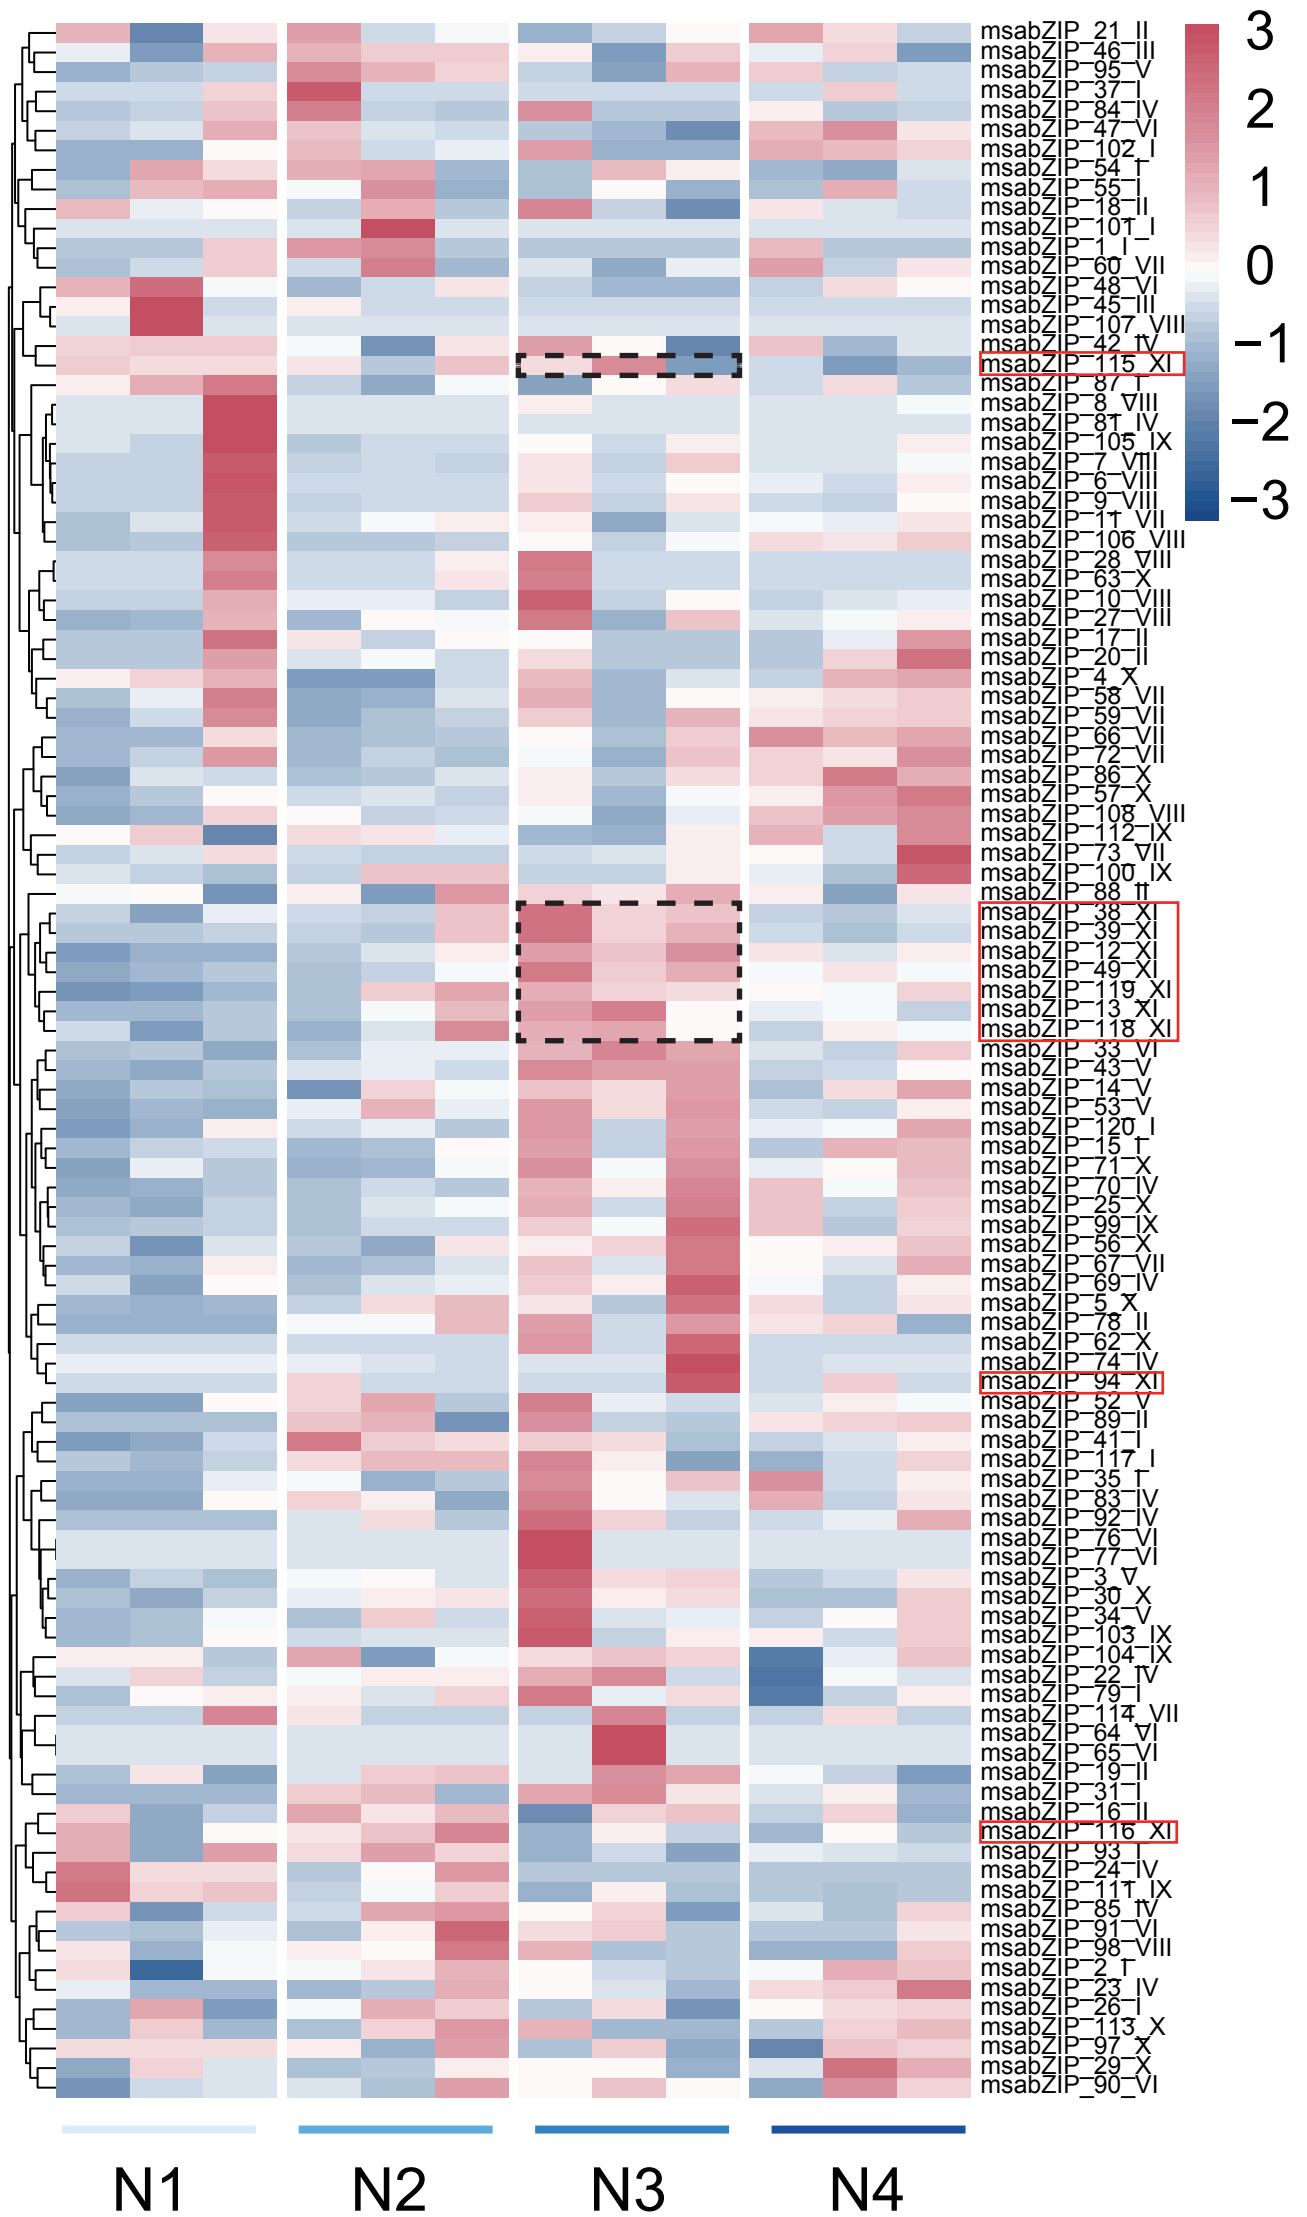

Supplement: s1 [file s1]
